# Supplementary material for: RNAScope-Ancestry: A Cross-Modality Framework for Inferring Genetic Ancestry from RNA-Seq with Application to MECA
Source: Research Square preprint supplement (doi:10.21203/rs.3.rs-7801062/v1), 2026-03-08
Supplement: Supplementary file 1 [file bd8bdad2165c66a0838d9515.docx]

**Table 1: List Population analyzed in this study**

| **Group** | **Population Name** | **Abbreviation** | **No. of Sample** | **Type** |
| --- | --- | --- | --- | --- |
| Admixed | African Caribbeans in Barbados | ACB | 96 | Reference |
|  | African Ancestry in Southwest US | ASW | 61 | Reference |
| African | Esan in Nigeria | ESN | 99 | Reference |
|  | Gambian in Western Division  The Gambia | GWD | 113 | Reference |
|  | Luhya in Webuye, Kenya | LWK | 99 | Reference |
|  | Mende in Sierra Leone | MSL | 85 | Reference |
|  | Yoruba in Ibadan, Nigeria | YRI | 108 | Reference |
| American | Peruvian in Lima, Peru | PEL | 85 | Reference |
| European | Utah Residents with NW  European Ancestry | CEU | 99 | Reference |
|  |  | FIN | 99 | Reference |
|  | British in England and Scotland | GBR | 91 | Reference |
|  | Iberian Population in Spain | IBS | 107 | Reference |
|  | Toscani in Italy | TSI | 107 | Reference |
| MECA Visit1 Patient | CVD samples (Atlanta & Neighborhoods | AFR | 490 | Query |
| MECA Visit2 Patient | CVD samples (Atlanta & Neighborhoods) | AFR | 109 | Query |
